# Supplementary material for: Crystal engineering of a co-crystal of antipyrine and 2-chlorobenzoic acid: relative energetic contributions based on multipolar refinement
Source: Royal Society of Chemistry journal article supplement (doi:10.1039/d2ce01179d), 2022-01-01
Supplement: d2ce01179d1.pdf [file d2ce01179d1.pdf]

## Supporting Information for

# Crystal Engineering of co-crystal of antipyrine and 2-chlorobenzoic acid: relative energetic contributions from multipolar refinement

Aqsa Bilal<sup>a</sup>, Arshad Mehmood<sup>b</sup>, Sajida Noureen<sup>a</sup>, Claude Lecomte<sup>c,d</sup>, Maqsood Ahmed<sup>a\*</sup>

<sup>a</sup>Materials Chemistry Laboratory, Institute of Chemistry, The Islamia University of Bahawalpur, Baghdad-ul-Jadeed Campus 63100, Pakistan.

<sup>b</sup>Department of Chemistry and Biochemistry, Texas Christian University, Fort Worth, Texas

76129, USA. <sup>c</sup>Universit  de Lorraine, Laboratoire CRM2, UMR CNRS 7036, Boulevard des aigillettes BP70239, Vandoeuvre-les-Nancy, 54506, France, and <sup>d</sup>CNRS, Laboratoire CRM2, UMR CNRS 7036, Boulevard des aigillettes, BP70239, Vandoeuvre-les-Nancy, 54506, France

\*Correspondence e-mail: [maqsood.ahmed@iub.edu.pk](mailto:maqsood.ahmed@iub.edu.pk)

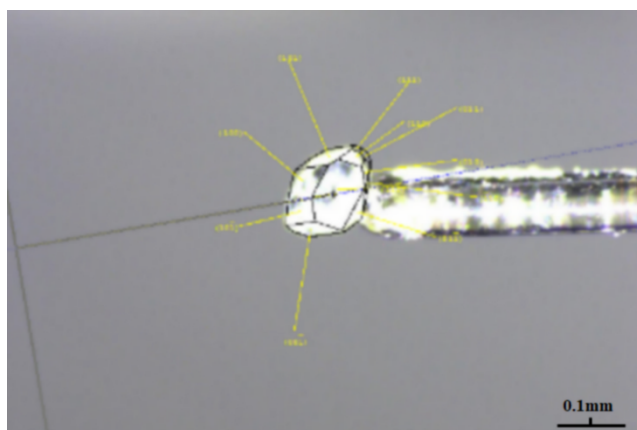

Figure S1 Crystal image of co-crystal mounted on glass

needle.

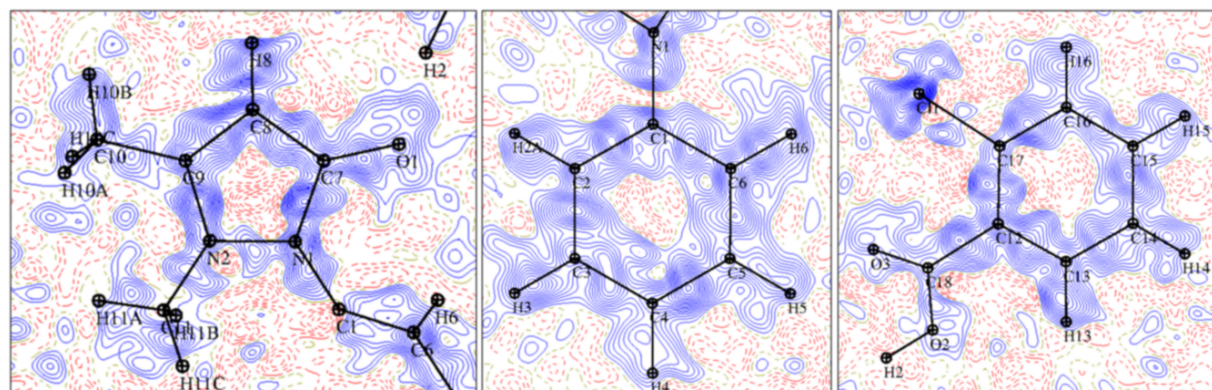

Figure S2 Residual electron density maps of molecular complex (AN-CBA) after IAM refinement with *MoPro* at contour level of  $0.05 \text{ e}^{-3}$  and with  $\sin\theta/\lambda=0.95 \text{ \AA}^{-1}$ .

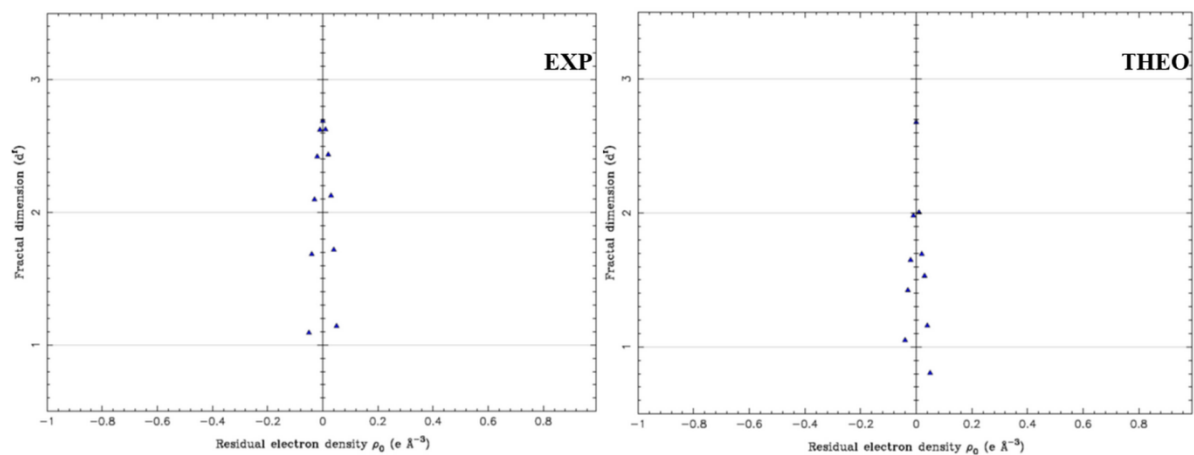

Figure S3: A fractal dimensions plot comparing the residual electron densities after experimental and theoretical ( $\sin\theta/\lambda$  of  $0.95 \text{ \AA}^{-1}$ ) multipolar refinements.

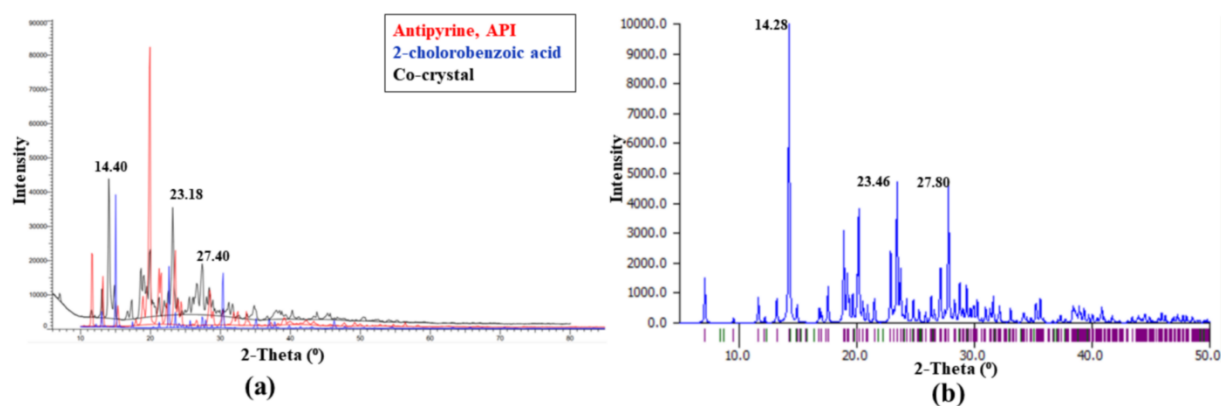

Figure S4 Powder X-ray diffraction pattern for co-crystal (AN-CBA), antipyrine and 2-chloro benzoic acid (a) and simulated pattern for co-crystal (b).

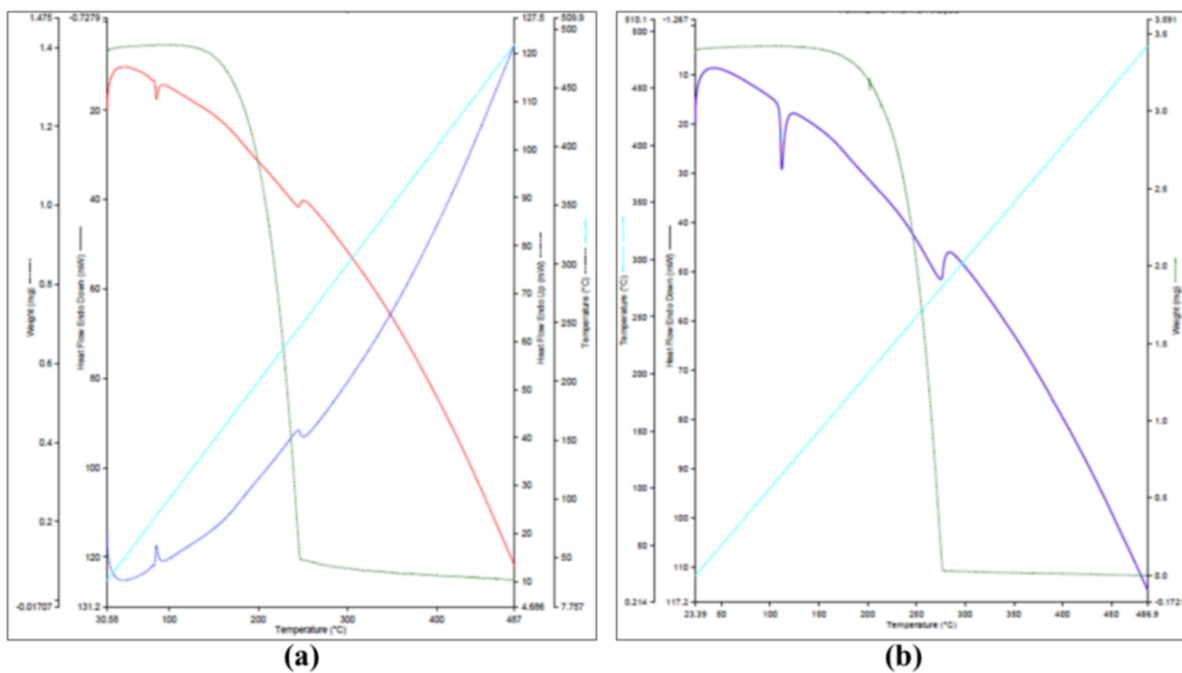

**Figure S5** TGA with DSC curve of (a) co-crystal, AN-CBA and (b) pure antipyrine.

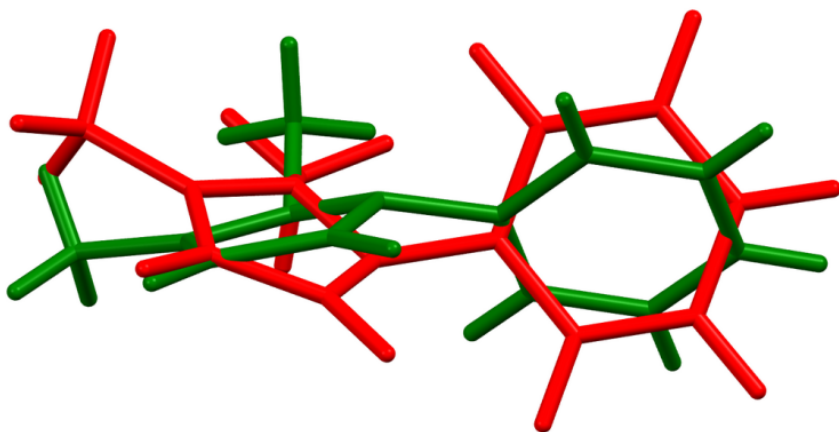

**Figure S6** A structure overlay of AN moiety in cocrystal (red) and pure drug (green).

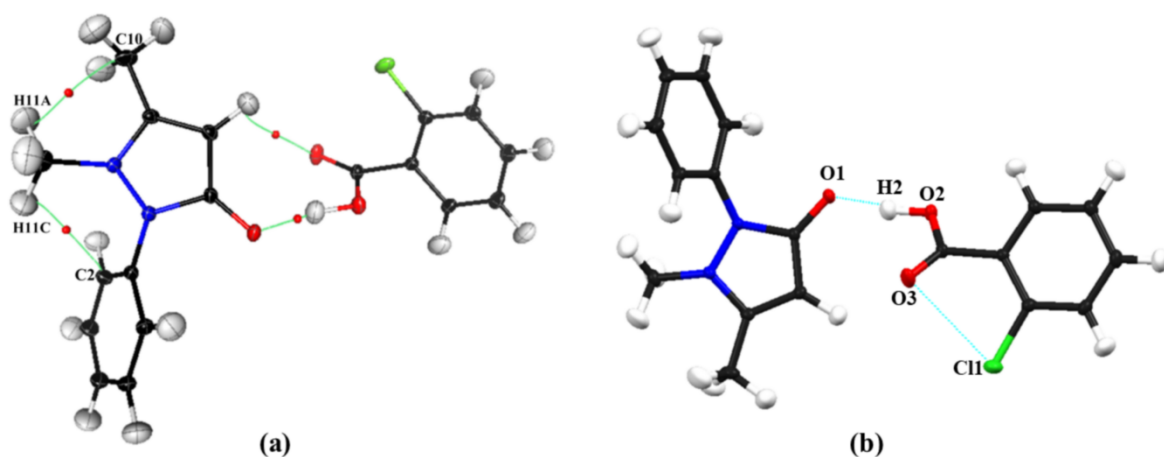

**Figure S7** Influence of non-covalent interaction, C $\cdots$ H: (a) chalcogen bond, O3 $\cdots$ C10 and (b) on molecular geometry of antipyrine in co-crystal.

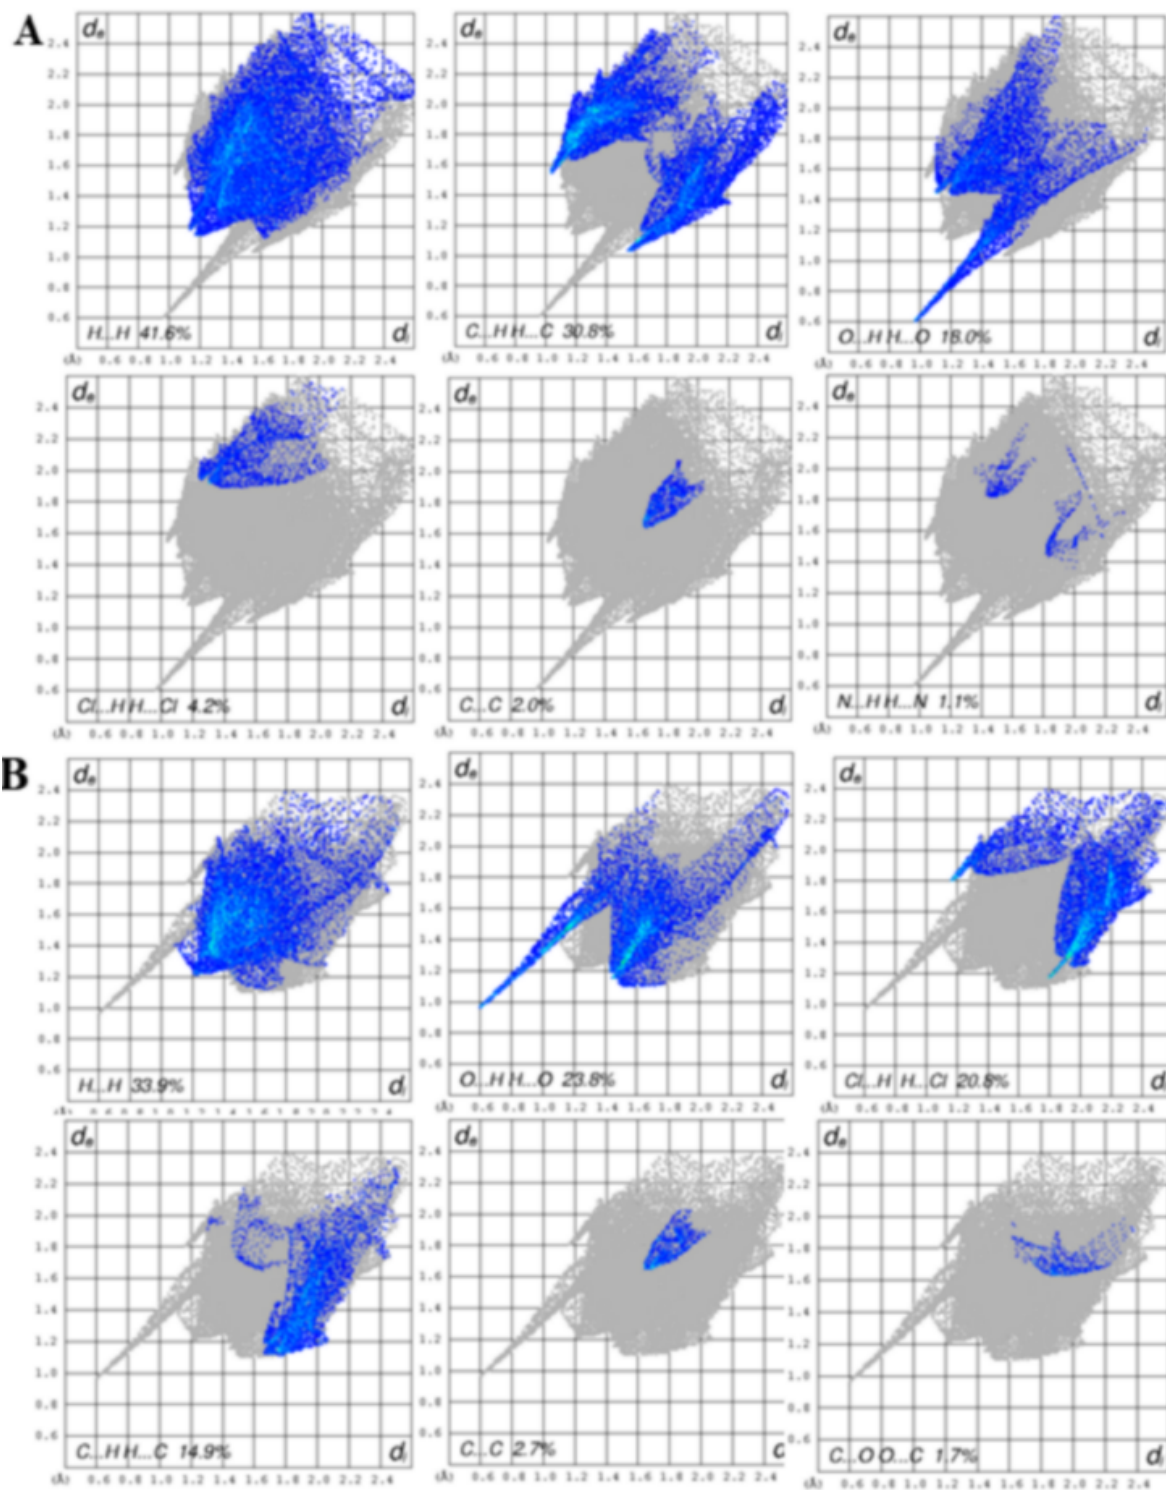

**Figure S8** Fingerprint plots of antipyrine (A) and 2-Chlorobenzoic acid (B), showing the percentage of various interactions in the co-crystal AN-CBA

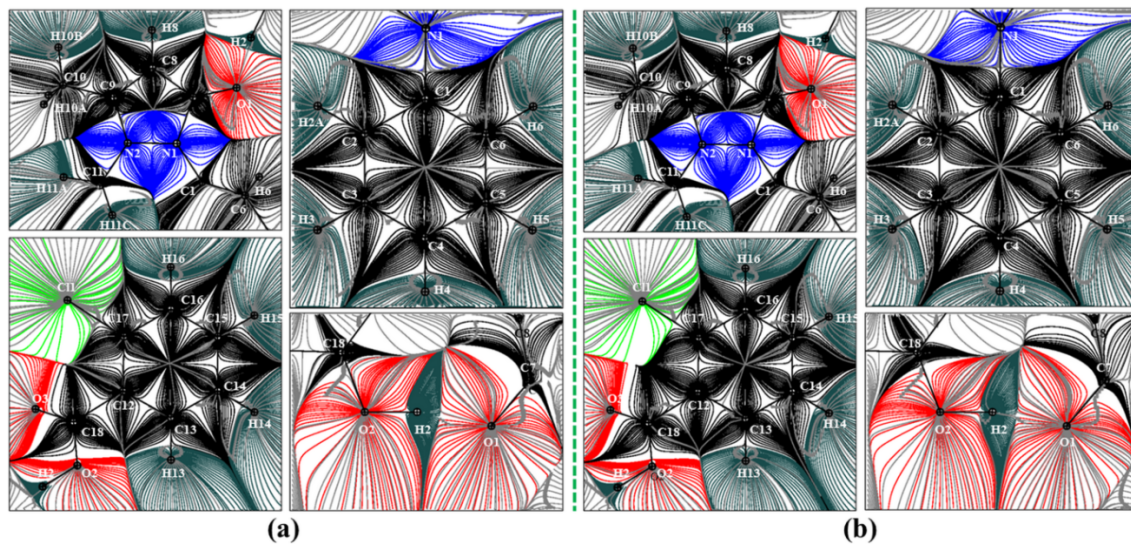

**Figure S9** Gradient vector field of (a)  $MM_{exp}$  and (b)  $MM_{theo}$  model of the molecular complex AN-CBA, showing the zero flux surfaces forming boundaries of atomic basin of individual atoms.

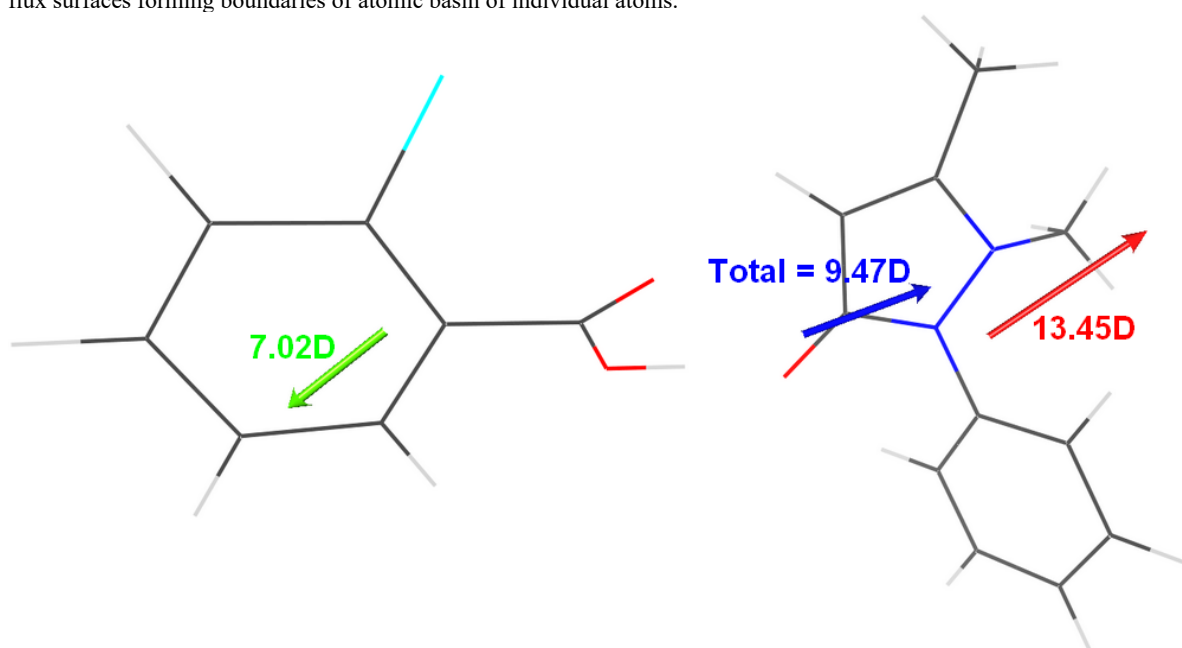

**Figure S10:** Dipole moment and their direction of molecular complex (AN-CBA).

**Table S1:** The optimized and neutron bond lengths of H atoms.

| No. | Bonds    | D <sub>optimise</sub> (Å) | D <sub>neutron</sub> (Å) |
|-----|----------|---------------------------|--------------------------|
| 1   | O2—H2    | 1.04627                   | 0.980                    |
| 2   | C2—H2A   | 1.08886                   | 1.083                    |
| 3   | C3—H3    | 1.08998                   | 1.083                    |
| 4   | C4—H4    | 1.08821                   | 1.083                    |
| 5   | C5—H5    | 1.08982                   | 1.083                    |
| 6   | C6—H6    | 1.08870                   | 1.083                    |
| 7   | C8—H8    | 1.08040                   | 1.083                    |
| 8   | C10—H10C | 1.09980                   | 1.077                    |
| 9   | C10—H10B | 1.09304                   | 1.077                    |
| 10  | C10—H10A | 1.09712                   | 1.077                    |
| 11  | C11—H10B | 1.09634                   | 1.077                    |
| 12  | C11—H10A | 1.09167                   | 1.077                    |
| 13  | C11—H10C | 1.09265                   | 1.077                    |
| 14  | C13—H13  | 1.08837                   | 1.083                    |
| 15  | C14—H14  | 1.08931                   | 1.083                    |
| 16  | C15—H15  | 1.08985                   | 1.083                    |
| 17  | C16—H16  | 1.08872                   | 1.083                    |

**Table S2:** List of chemical constraints.

|             |      |    |      |      |      |     |
|-------------|------|----|------|------|------|-----|
| CONKAP      | C2   |    |      |      | C6   |     |
| CONKAP      | C3   |    |      |      | C5   |     |
| CONKAP      | C4   |    |      |      | C14  |     |
| CONKAP      | H2A  |    |      |      | H6   |     |
| CONKAP      | H3   | H4 | H5   | H13  | H14  | H15 |
| CONKAP      | H10A |    | H10B |      | H10C |     |
| CONKAP      | H11A |    | H11B |      | H11C |     |
|             |      |    |      |      |      |     |
| AVEPVM      | C2   |    |      |      | C6   |     |
| AVEPVM      | C3   |    |      |      | C5   |     |
| AVEPVM      | C4   |    |      |      | C14  |     |
| AVEPVM      | C3   |    | C4   |      | C13  | C15 |
| AVEPVM      | H2A  |    |      |      | H6   |     |
| AVEPVM      | H3   | H4 | H5   | H13  | H14  | H15 |
| AVEPVM      | H10A |    | H10B |      | H10C |     |
| AVEPVM      | H11A |    | H11B |      | H11C |     |
| AVEPVM      | H2A  | H3 | H8   | H10A | H16  |     |
|             |      |    |      |      |      |     |
| SYMPLM mxmy |      |    | C11  |      |      |     |
| SYMPLM      |      |    | N1   |      |      |     |
| SYMPLM mz   |      |    | O1   |      |      |     |
| SYMPLM mymz |      |    | C1   |      |      |     |
| SYMPLM mz   |      |    | O2   |      |      |     |
| SYMPLM      |      |    | N2   |      |      |     |
| SYMPLM mymz |      |    | C2   |      |      |     |
| SYMPLM mymz |      |    | C3   |      |      |     |
| SYMPLM mz   |      |    | O3   |      |      |     |
| SYMPLM mymz |      |    | C4   |      |      |     |
| SYMPLM mymz |      |    | C5   |      |      |     |
| SYMPLM mymz |      |    | C6   |      |      |     |
| SYMPLM mz   |      |    | C7   |      |      |     |
| SYMPLM mz   |      |    | C8   |      |      |     |
| SYMPLM mz   |      |    | C9   |      |      |     |
| SYMPLM 3m   |      |    | C10  |      |      |     |
| SYMPLM 3m   |      |    | C11  |      |      |     |
| SYMPLM mz   |      |    | C12  |      |      |     |
| SYMPLM mymz |      |    | C13  |      |      |     |
| SYMPLM mymz |      |    | C14  |      |      |     |
| SYMPLM mymz |      |    | C15  |      |      |     |
| SYMPLM mymz |      |    | C16  |      |      |     |
| SYMPLM mz   |      |    | C17  |      |      |     |
| SYMPLM mz   |      |    | C18  |      |      |     |

**Table S3**

Crystallographic Refinement details of the AN-CBA cocrystal without  $I/\sigma$  cutoff.

| Refinement                                                        | <i>MM (MoPro)</i>                                       | <i>IAM (MoPro)</i> |
|-------------------------------------------------------------------|---------------------------------------------------------|--------------------|
| Total Number of reflection measured/independent                   | 119630/13656                                            |                    |
| Weighting scheme                                                  | $\sigma w^2 = (a \text{sig} Y_o)^2$ where $a = 1.73034$ |                    |
| Refinement based on                                               | $F^2$                                                   | $F^2$              |
| $R[F^2 > 2\sigma(F^2)]$ , $wR(F^2)$ , $S$                         | 0.044, 0.029, 0.99                                      | 0.062, 0.101, 0.99 |
| No. of reflections used                                           | 12342                                                   | 12342              |
| No. of parameters                                                 | 804                                                     | 217                |
| $\Delta \rho_{\min}, \Delta \rho_{\max}$ ( $e \text{ \AA}^{-3}$ ) | -1.084, 0.955                                           | -0.698, 0.756      |

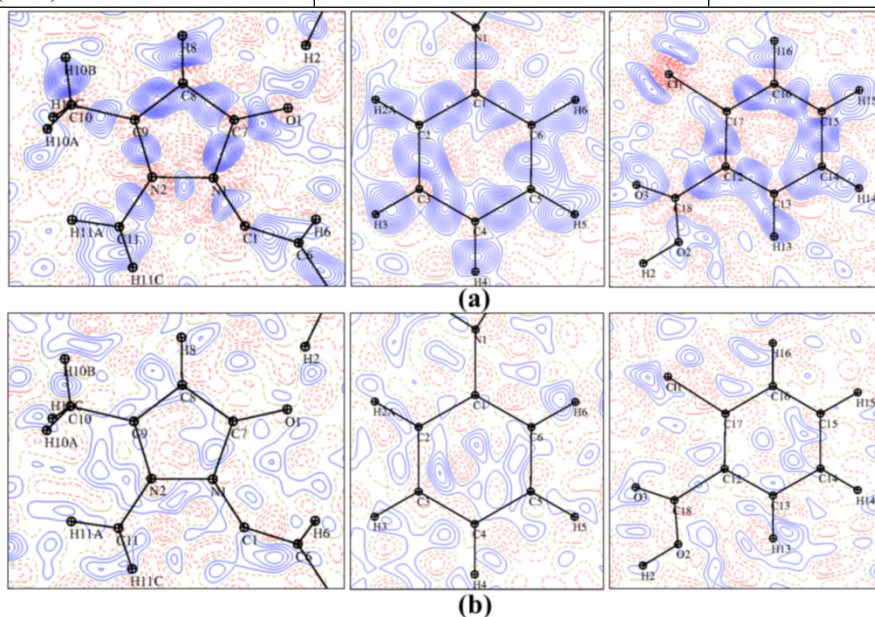

**Figure S11** Residual electron density maps of molecular complex (AN-CBA) after (a) IAM and (b)  $MM_{\text{exp}}$  refinement with *MoPro* at contour level of  $0.05 e \text{ \AA}^{-3}$  and with  $\sin\theta/\lambda=0.7 \text{ \AA}^{-1}$ .

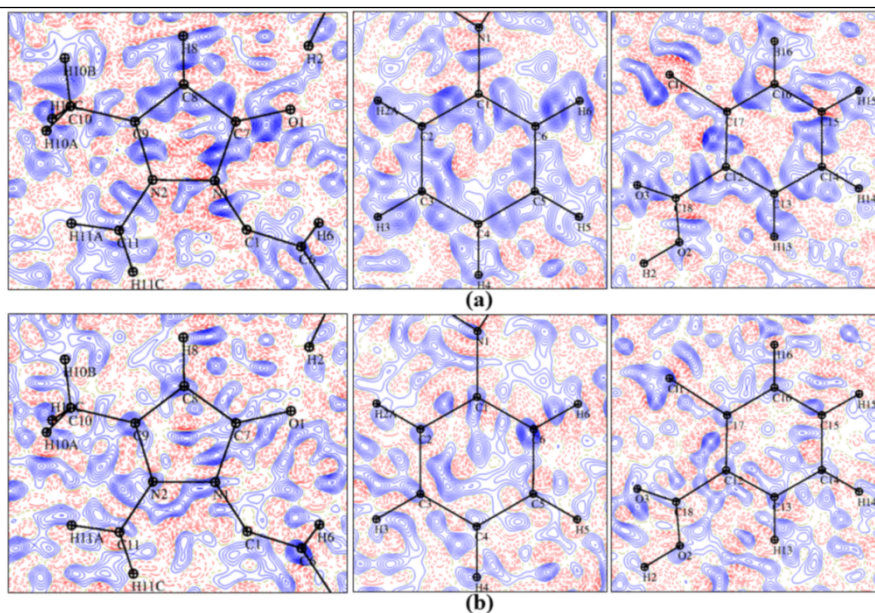

**Figure S12** Residual electron density maps of molecular complex (AN-CBA) after (a) IAM and (b)  $MM_{\text{exp}}$  refinement with *MoPro* at contour level of  $0.05 e \text{ \AA}^{-3}$  and with  $\sin\theta/\lambda=0.95 \text{ \AA}^{-1}$ .



## S1. Charge density distribution

The study of topological properties reveals important information about bond type i.e. covalent, ionic, H—H interaction, Van der Waal's forces and strength of chemical bonds <sup>1</sup>. Topological analysis of **(I)** has been performed based on the following topological indicators i.e. the electron density, ellipticity, electrostatic potential and dipole moment. There is a very good agreement between the experimental and theoretical values that prove that the experimental model is correct. All BCPs, electron density  $\rho_{\text{BCP}}(r)$ , and laplacians of electron density of co-crystal have been calculated and summarized in **Table S4**. The electron density derived topological parameter of pyrazalone ring, later discussed in detail, are yet to be reported in literature.

Static deformation density  $[\Delta\rho_{\text{static}}(r)]$  map was plotted using *MoProViewer* software <sup>2</sup> and shown in **Figure S13(a)**. These maps represent comparable results with characteristic accumulation of electron density both in bonding as well as lone pair regions. In particular, the loan pair around O1 and O3 is normal for carbonyl oxygen participating as acceptors of hydrogen bonds ( $\text{C7}=\text{O1}\cdots\text{H2}$  and  $\text{C18}=\text{O3}\cdots\text{H8}$ ). However, a sharp contrast in electron density accumulated at N1—N2 and N1—C7 in pyrazalone ring is observed in both experimental and theoretical model (table S3).

The aspherical electron density distribution observed around Cl atom in static deformation density maps is due to polar fattening effect <sup>3, 4</sup>; better depicted by the 3D static deformation density map as illustrated in **Figure S13(b)**.

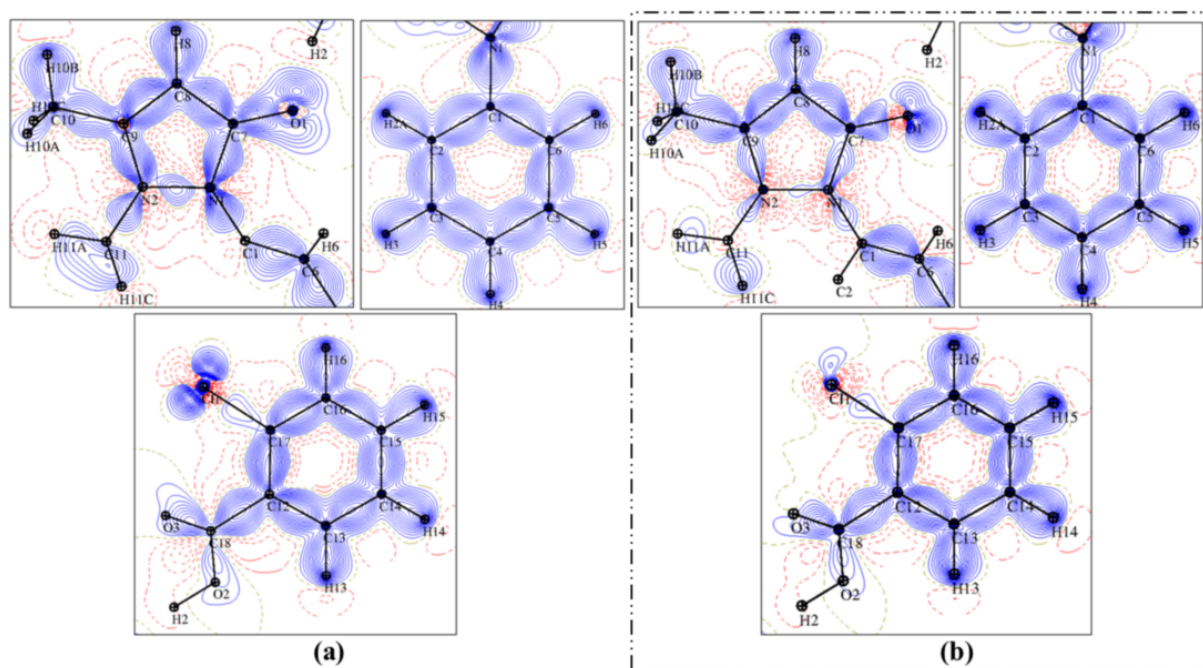

**Figure S13** (a) Static deformation density maps after (a)  $\text{MM}_{\text{exp}}$  and (b)  $\text{MM}_{\text{theo}}$  refinement at contour level of  $0.05 \text{ e } \text{\AA}^{-3}$ .

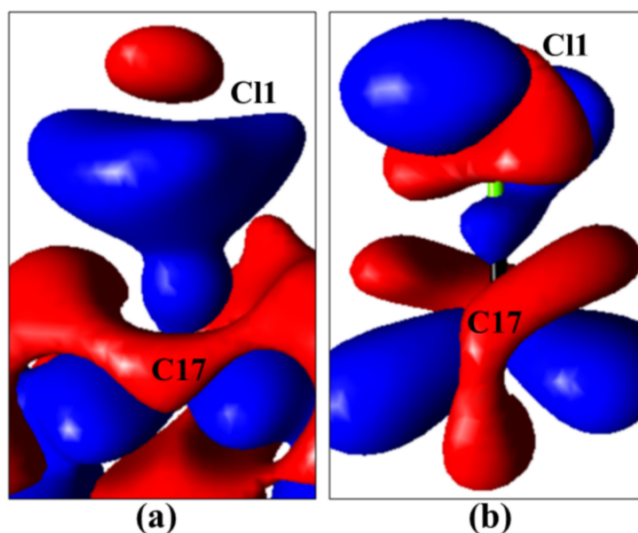

**Figure S13 (b)** 3D static deformation density maps of C17-C11 bond after (a)  $MM_{exp}$  and (b)  $MM_{theo}$  refinement at contour level of  $0.05 e \text{ \AA}^{-3}$ .

**Table S4**

Topological properties of (3, -1) CPs in covalent interaction of (AN-CBA): distance ( $\text{\AA}$ ), electron density ( $e \text{ \AA}^{-3}$ ), Laplacian ( $e \text{ \AA}^{-5}$ ), Hessians eigenvalues ( $e \text{ \AA}^{-5}$ ), and  $\varepsilon$  = ellipticity. The experimental values are given in upper line and theoretical values in lower line.

| Bond    | $d_{12}$ | $d_{1CP}$ | $d_{2BCP}$ | $\rho_{BCP}(\mathbf{r})$ | $\nabla^2_{BCP}(\mathbf{r})$ | $\lambda_1$ | $\lambda_2$ | $\lambda_3$ | $\varepsilon$ |
|---------|----------|-----------|------------|--------------------------|------------------------------|-------------|-------------|-------------|---------------|
| O3=C18  | 1.214    | 0.795     | 0.419      | 2.964                    | -26.860                      | -29.92      | -25.09      | 28.15       | 0.192         |
|         | 1.214    | 0.777     | 0.437      | 2.868                    | -28.059                      | -25.27      | -22.84      | 20.05       | 0.106         |
| O1=C7   | 1.257    | 0.805     | 0.452      | 2.684                    | -29.082                      | -23.56      | -20.85      | 15.33       | 0.130         |
|         | 1.257    | 0.784     | 0.473      | 2.557                    | -27.165                      | -21.94      | -18.20      | 12.97       | 0.206         |
| O2—C18  | 1.318    | 0.838     | 0.480      | 2.314                    | -27.079                      | -19.74      | -17.99      | 10.65       | 0.097         |
|         | 1.318    | 0.809     | 0.509      | 2.284                    | -21.370                      | -18.08      | -16.59      | 13.30       | 0.090         |
| N1—N2   | 1.392    | 0.692     | 0.700      | 2.222                    | -4.196                       | -18.44      | -16.15      | 30.39       | 0.141         |
|         | 1.392    | 0.699     | 0.693      | 2.015                    | 2.754                        | -16.31      | -12.72      | 31.78       | 0.283         |
| C8—C9   | 1.371    | 0.674     | 0.698      | 2.216                    | -18.901                      | -16.84      | -12.80      | 10.74       | 0.315         |
|         | 1.371    | 0.644     | 0.727      | 2.095                    | -16.388                      | -15.75      | -11.58      | 10.94       | 0.360         |
| C12—C13 | 1.401    | 0.714     | 0.687      | 2.156                    | -18.936                      | -16.42      | -13.42      | 10.91       | 0.224         |
|         | 1.401    | 0.708     | 0.693      | 2.061                    | -16.281                      | -15.56      | -12.37      | 11.65       | 0.258         |
| C13—C14 | 1.392    | 0.706     | 0.685      | 2.155                    | -18.765                      | -15.44      | -13.41      | 10.08       | 0.152         |
|         | 1.392    | 0.701     | 0.690      | 1.993                    | -15.259                      | -14.68      | -11.94      | 11.36       | 0.229         |
| C3—C4   | 1.393    | 0.708     | 0.686      | 2.154                    | -18.652                      | -15.38      | -13.37      | 10.10       | 0.151         |
|         | 1.393    | 0.698     | 0.695      | 2.173                    | -18.040                      | -16.58      | -13.70      | 12.24       | 0.210         |
| C4—C5   | 1.395    | 0.687     | 0.709      | 2.148                    | -18.519                      | -15.34      | -13.32      | 10.14       | 0.151         |
|         | 1.395    | 0.694     | 0.702      | 2.077                    | -16.700                      | -15.60      | -13.04      | 11.93       | 0.197         |
| C1—C2   | 1.395    | 0.707     | 0.688      | 2.141                    | -18.148                      | -16.00      | -13.11      | 10.96       | 0.220         |
|         | 1.395    | 0.712     | 0.683      | 2.092                    | -17.120                      | -16.14      | -12.91      | 11.93       | 0.250         |
| C1—C6   | 1.396    | 0.707     | 0.689      | 2.138                    | -18.082                      | -15.97      | -13.09      | 10.98       | 0.220         |
|         | 1.396    | 0.713     | 0.683      | 2.176                    | -18.312                      | -16.91      | -13.63      | 12.23       | 0.241         |
| C12—C17 | 1.402    | 0.712     | 0.690      | 2.137                    | -17.857                      | -16.62      | -12.72      | 11.48       | 0.306         |
|         | 1.402    | 0.692     | 0.711      | 2.005                    | -15.068                      | -14.86      | -11.94      | 11.73       | 0.245         |

|          |       |       |       |       |         |        |        |       |       |
|----------|-------|-------|-------|-------|---------|--------|--------|-------|-------|
| C2—C3    | 1.393 | 0.694 | 0.700 | 2.133 | -18.613 | -16.06 | -13.11 | 10.56 | 0.225 |
|          | 1.393 | 0.701 | 0.692 | 1.974 | -14.777 | -14.51 | -12.05 | 11.78 | 0.204 |
| C16—C17  | 1.394 | 0.696 | 0.698 | 2.132 | -17.738 | -16.18 | -12.81 | 11.25 | 0.263 |
|          | 1.394 | 0.685 | 0.709 | 1.968 | -14.516 | -14.51 | -11.58 | 11.57 | 0.253 |
| C5—C6    | 1.394 | 0.700 | 0.694 | 2.130 | -18.522 | -16.03 | -13.08 | 10.58 | 0.226 |
|          | 1.394 | 0.692 | 0.702 | 1.977 | -14.736 | -14.52 | -12.06 | 11.84 | 0.204 |
| N2—C9    | 1.363 | 0.833 | 0.531 | 2.120 | -16.174 | -15.75 | -14.21 | 13.78 | 0.109 |
|          | 1.363 | 0.790 | 0.573 | 1.980 | -12.862 | -14.61 | -12.00 | 13.75 | 0.218 |
| N1—C7    | 1.394 | 0.824 | 0.570 | 2.109 | -18.386 | -16.47 | -13.93 | 12.01 | 0.183 |
|          | 1.394 | 0.803 | 0.591 | 1.834 | -10.295 | -13.40 | -10.90 | 14.00 | 0.230 |
| C14—C15  | 1.394 | 0.697 | 0.697 | 2.103 | -17.829 | -15.02 | -13.10 | 10.29 | 0.147 |
|          | 1.394 | 0.692 | 0.702 | 2.054 | -16.258 | -15.32 | -12.53 | 11.58 | 0.223 |
| C15—C16  | 1.392 | 0.683 | 0.709 | 2.090 | -17.623 | -15.51 | -12.98 | 10.87 | 0.196 |
|          | 1.392 | 0.693 | 0.699 | 2.100 | -16.982 | -16.02 | -12.70 | 11.74 | 0.261 |
| C7—C8    | 1.422 | 0.766 | 0.657 | 2.016 | -16.826 | -14.61 | -11.73 | 9.51  | 0.245 |
|          | 1.422 | 0.753 | 0.670 | 1.964 | -14.364 | -14.41 | -11.35 | 11.39 | 0.270 |
| N1—C1    | 1.421 | 0.872 | 0.549 | 1.857 | -11.686 | -12.42 | -11.38 | 12.12 | 0.092 |
|          | 1.421 | 0.803 | 0.618 | 1.736 | -8.231  | -12.72 | -10.95 | 15.44 | 0.162 |
| C12—C18  | 1.499 | 0.742 | 0.757 | 1.824 | -14.975 | -13.71 | -11.85 | 10.59 | 0.157 |
|          | 1.499 | 0.737 | 0.762 | 1.674 | -11.000 | -11.77 | -10.43 | 11.20 | 0.129 |
| C8—H8    | 1.080 | 0.739 | 0.342 | 1.824 | -17.836 | -17.74 | -16.67 | 16.57 | 0.065 |
|          | 1.080 | 0.703 | 0.378 | 1.735 | -14.743 | -15.95 | -14.89 | 16.10 | 0.071 |
| C6—H6    | 1.089 | 0.739 | 0.350 | 1.820 | -16.887 | -17.50 | -16.89 | 17.51 | 0.036 |
|          | 1.089 | 0.716 | 0.373 | 1.808 | -15.488 | -16.81 | -16.06 | 17.38 | 0.047 |
| C2—H2A   | 1.089 | 0.739 | 0.350 | 1.820 | -16.873 | -17.49 | -16.89 | 17.51 | 0.036 |
|          | 1.089 | 0.729 | 0.360 | 1.818 | -15.650 | -17.38 | -16.48 | 18.21 | 0.055 |
| C16—H16  | 1.089 | 0.736 | 0.353 | 1.802 | -15.961 | -17.28 | -16.81 | 18.13 | 0.028 |
|          | 1.089 | 0.719 | 0.370 | 1.748 | -14.551 | -15.91 | -15.76 | 17.12 | 0.010 |
| C13—H13  | 1.088 | 0.729 | 0.360 | 1.793 | -15.946 | -16.42 | -16.34 | 16.81 | 0.005 |
|          | 1.088 | 0.721 | 0.367 | 1.794 | -15.532 | -16.57 | -16.09 | 17.13 | 0.030 |
| C5—H5    | 1.090 | 0.730 | 0.360 | 1.791 | -15.875 | -16.76 | -15.90 | 16.79 | 0.054 |
|          | 1.090 | 0.726 | 0.364 | 1.826 | -15.548 | -17.33 | -16.50 | 18.28 | 0.051 |
| C3—H3    | 1.090 | 0.730 | 0.360 | 1.791 | -15.864 | -16.75 | -15.90 | 16.79 | 0.054 |
|          | 1.090 | 0.719 | 0.371 | 1.766 | -14.411 | -16.37 | -15.73 | 17.69 | 0.040 |
| C4—H4    | 1.088 | 0.721 | 0.367 | 1.745 | -14.782 | -16.01 | -15.29 | 16.51 | 0.047 |
|          | 1.088 | 0.712 | 0.377 | 1.740 | -14.375 | -15.89 | -15.25 | 16.77 | 0.042 |
| C15—H15  | 1.090 | 0.723 | 0.367 | 1.742 | -15.044 | -16.16 | -15.37 | 16.49 | 0.051 |
|          | 1.090 | 0.706 | 0.384 | 1.741 | -14.310 | -15.75 | -14.95 | 16.38 | 0.054 |
| C14—H14  | 1.089 | 0.722 | 0.368 | 1.742 | -14.721 | -15.97 | -15.25 | 16.50 | 0.047 |
|          | 1.089 | 0.730 | 0.359 | 1.793 | -15.567 | -17.08 | -16.13 | 17.63 | 0.059 |
| N2—C11   | 1.458 | 0.859 | 0.599 | 1.723 | -11.589 | -11.72 | -10.67 | 10.80 | 0.099 |
|          | 1.458 | 0.830 | 0.628 | 1.570 | -5.352  | -10.84 | -9.61  | 15.09 | 0.128 |
| C10—H10B | 1.093 | 0.726 | 0.367 | 1.720 | -13.599 | -15.70 | -15.11 | 17.22 | 0.039 |
|          | 1.093 | 0.705 | 0.388 | 1.676 | -12.645 | -14.68 | -14.49 | 16.52 | 0.013 |
| C10—H10A | 1.097 | 0.729 | 0.369 | 1.709 | -13.320 | -15.55 | -14.96 | 17.19 | 0.039 |
|          | 1.097 | 0.721 | 0.377 | 1.716 | -13.221 | -15.31 | -15.24 | 17.33 | 0.004 |

|          |       |       |       |       |         |        |        |       |       |
|----------|-------|-------|-------|-------|---------|--------|--------|-------|-------|
| O2—H2    | 1.046 | 0.825 | 0.221 | 1.709 | -18.778 | -25.09 | -24.95 | 31.27 | 0.006 |
|          | 1.046 | 0.795 | 0.252 | 1.616 | -10.997 | -20.84 | -20.83 | 30.67 | 0.000 |
| C10—H10C | 1.100 | 0.730 | 0.370 | 1.702 | -13.143 | -15.41 | -14.90 | 17.16 | 0.034 |
|          | 1.100 | 0.723 | 0.377 | 1.742 | -13.750 | -15.75 | -15.38 | 17.38 | 0.024 |
| C9—C10   | 1.483 | 0.721 | 0.762 | 1.693 | -10.606 | -11.90 | -10.83 | 12.12 | 0.099 |
|          | 1.483 | 0.784 | 0.699 | 1.758 | -11.467 | -12.27 | -10.86 | 11.66 | 0.130 |
| C11—H11A | 1.092 | 0.785 | 0.307 | 1.571 | -15.867 | -15.67 | -13.50 | 13.31 | 0.160 |
|          | 1.092 | 0.727 | 0.365 | 1.806 | -15.318 | -17.13 | -16.51 | 18.33 | 0.038 |
| C11—H11C | 1.093 | 0.786 | 0.307 | 1.568 | -15.794 | -15.62 | -13.48 | 13.30 | 0.158 |
|          | 1.093 | 0.717 | 0.376 | 1.711 | -13.820 | -15.91 | -15.13 | 17.23 | 0.052 |
| C11—H11B | 1.096 | 0.788 | 0.309 | 1.558 | -15.532 | -15.47 | -13.35 | 13.29 | 0.159 |
|          | 1.096 | 0.730 | 0.366 | 1.799 | -14.252 | -16.82 | -16.45 | 19.02 | 0.023 |
| C11—C17  | 1.729 | 0.982 | 0.747 | 1.308 | -1.876  | -7.77  | -7.01  | 12.91 | 0.108 |
|          | 1.729 | 0.986 | 0.743 | 1.265 | -0.449  | -7.11  | -6.20  | 12.87 | 0.147 |

A graphical representation of BCP of co-crystal at all (3, -1) critical points ([Figure S14](#)) reveal the dissimilar positioning of the bond critical points for homonuclear and heteronuclear bonds: Position of BCPs in C—C and N—N bonds is at the middle of bond whereas BCPs of C—H, C—N and C—O bonds tend to shift towards the electropositive atoms. The carboxyl C—O bond (C18—O2; 2.314/2.284  $e\text{\AA}^{-3}$ ) exhibits low electron density accumulation compared to O3=C18 and O1=C7 bonds which conform that electron density is more concentrated at carbonyl functional group than other C—O bonds. The N—C bonds in pyrazolone ring exhibit different electron densities ranging from 2.120/1.980  $e\text{\AA}^{-3}$  to 1.723/1.570  $e\text{\AA}^{-3}$  (experimental/theoretical) which is comparable with literature<sup>5-10</sup>,  $> 2.2 \pm 0.2 e\text{\AA}^{-3}$ . Out of all N—C interactions, the N1—C7 bond has the higher value of electron density owing to the neighbouring O1 atom while the highest density accumulation is observed at N2—C9 bond due covalently bonded electron donating C10-methyl group; resulting density depletion at neighbouring covalent bond. Additionally, the electron density contained by C—H bond in benzene rings is higher as compared to that of C—H bond in methyl group. Among all the homonuclear bonds, the N1—N2 bond in pyrazolone ring has maximum comparable theoretical and experimental electron density of 2.222/2.015  $e\text{\AA}^{-3}$ . This concludes a higher concentration of electron density in N—N bonds compared to C—C bonds but still lower than the C=O and C—O heteroatomic bonds.

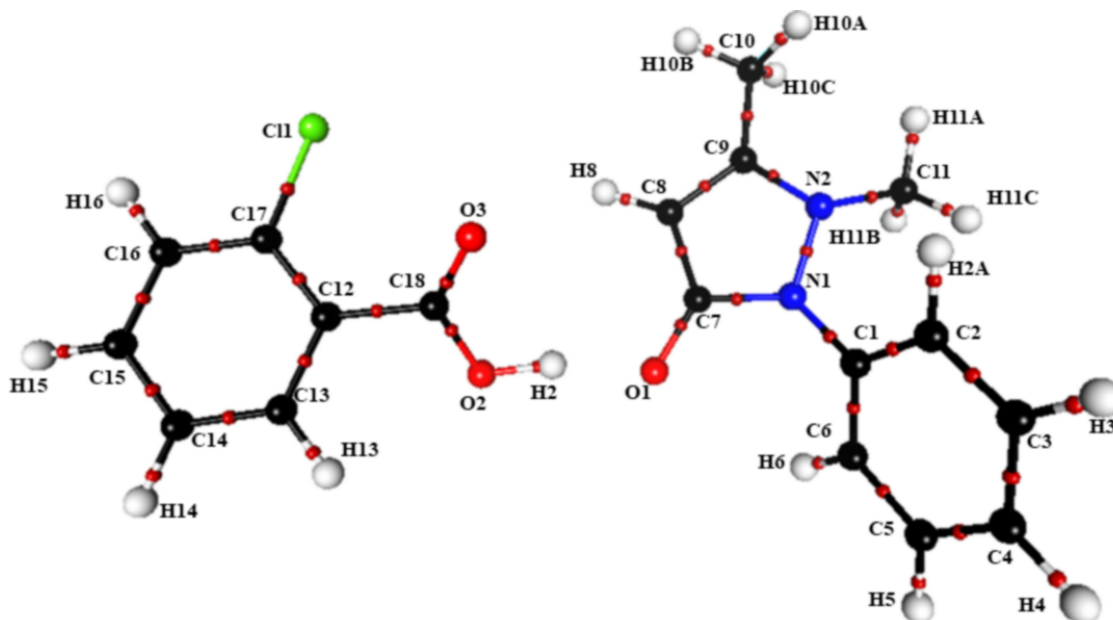

**Figure S14** A view of co-crystal showing the covalent bond critical point with atom numbering scheme.

Laplacian of electron density  $\nabla^2_{BCP}(\mathbf{r})$  as shown in **Figure S15** portray well correlated charge density concentrated and depleted regions in experimental and theoretical model which defines the electrophilic and nucleophilic sites of attacking in the various systems <sup>11</sup>. The negative laplacian of electron density observed at carbonyl functional group (O3=C18; -26.86/-28.06  $e\text{\AA}^{-5}$  and O1=C7; -29.08/-27.17  $e\text{\AA}^{-5}$ ; experimental/theoretical) is higher than carboxyl O2—C8 (-27.08/-21.37  $e\text{\AA}^{-5}$ ) and hydroxyl group (O2—H2; -18.78/-10.10  $e\text{\AA}^{-5}$ ). Additionally, the topological difference of experimental and theoretical charge density especially laplacian of polar bond is evident in table 3, not surprising as the anisotropic displacement parameters are not taken into account for the theoretical model. The carbon atom bonded to heavy atom (C11—C17) has laplacian of -1.88/-0.45  $e\text{\AA}^{-5}$ , indicating that it contains much lower charge density accumulation at BCP than other bonds. The C—C bond of aromatic ring exhibits strongest negative laplacian of electron density (-18.94/-16.28 to -17.62/-16.98  $e\text{\AA}^{-5}$ ) which is consistent with aromatic delocalized bonding, as expected. Nevertheless the laplacian of electron value for N1—N2 bond is the smallest among all the bonds, at -4.20/2.75  $e\text{\AA}^{-5}$ , indicating that charge concentration at this bond is lowest compared to other bonds and this noteworthy difference is due to the neighbouring benzene ring and methyl group. The negative values of  $\nabla^2\rho$  (as tabulated in table 3) are a sign of the expected shared shell (covalent) character of all bonding interactions in co-crystal.

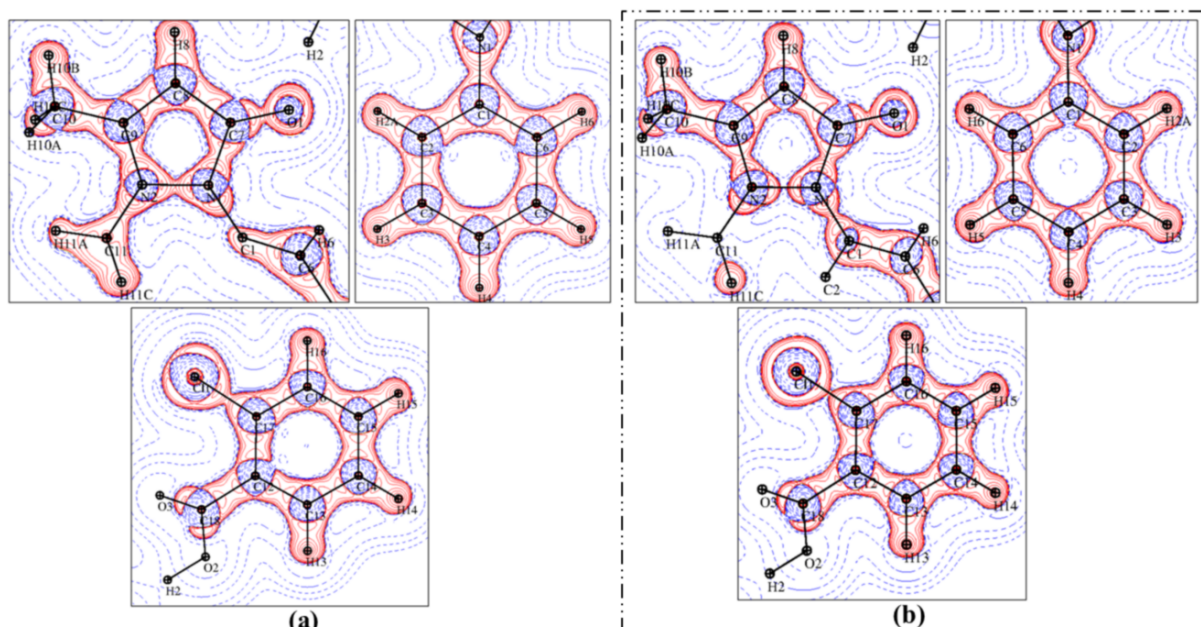

**Figure S15** Laplacian maps after (a)  $MM_{\text{exp}}$  and (b)  $MM_{\text{theo}}$  refinement at contour level of  $0.05 \text{ e } \text{\AA}^{-3}$ .

Bond ellipticity [ $\varepsilon = \lambda_1 / \lambda_2 - 1$ ] measures the extent of privileged charge accretion in a plane vertical to the bond path<sup>11</sup>. Thus it gives an insight into the symmetric nature of electron density at BCPs and bonding nature, sigma and pi character of the bond<sup>12, 13</sup>. Bonds with cylindrical symmetry have  $\varepsilon=0$  but this value is greater than 0 if a double bond is present. According to Bader, charge density prefers to accumulate more in the plane of ring than in the  $\pi$ -plane. Therefore in case of homonuclear bonds of the ring (C—C and N—N), the C8—C9, C16—C17 and N1—N2 have ellipticity of 0.315/0.360, 0.263/0.253, and 0.141/0.283 (experimental/theoretical), depicting that the  $\varepsilon$  value is relatively higher than carbonyl bonds. Furthermore, N1—C7 bond has  $\varepsilon$  value of 0.183/0.230, which is higher than all other N—C bonds in pyrazalone ring. As for C—H bonds the ellipticity value lies in 0.005/0.030-0.160/0.038 range. The carbonyl group (O3=C18 and O1=C7) with ellipticity of 0.192/0.106 and 0.130/0.206 shows an elevation in ellipticity compared to O2—C18 bond (0.097/0.090), indicating deformation or double bond. However amongst all the bond, the O2—H1 hydroxyl bond has the smallest  $\varepsilon$  value, 0.006/0.000.

**Table S5**

Topological properties of (3, -1) CPs in intermolecular interaction of the AN-CBA: distance (Å), electron density ( $e \text{ \AA}^{-3}$ ), Laplacian ( $e \text{ \AA}^{-5}$ ), Hessians eigenvalues ( $e \text{ \AA}^{-5}$ ),  $\varepsilon$  = ellipticity,  $G_{CP}$  = bond kinetic-energy density ( $\text{kJ mol}^{-1} \text{ Bhor}^{-3}$ ) and  $V_{CP}$  = bond potential-energy density ( $\text{kJ mol}^{-1} \text{ Bhor}^{-3}$ ). Experimental and Theoretical values are given in blue and red, respectively.

| Interactions               | $d_{12}$ | $d_{1CP}$ | $d_{2BCP}$ | $\rho_{BCP}$<br>(r) | $\nabla^2\rho$<br>(BCP) | $\lambda_1$ | $\lambda_2$ | $\lambda_3$ | $\varepsilon$ | $G_{CP}$ | $V_{CP}$ |
|----------------------------|----------|-----------|------------|---------------------|-------------------------|-------------|-------------|-------------|---------------|----------|----------|
| O2—H2···O1                 | 1.513    | 0.426     | 1.058      | 0.426               | 5.878                   | -2.96       | -2.93       | 11.77       | 0.009         | 182.14   | -204.17  |
|                            | 1.513    | 0.485     | 1.028      | 0.410               | 5.857                   | -2.77       | -2.75       | 11.38       | 0.008         | 177.01   | -194.49  |
| C10—H10A···C8 <sup>i</sup> | 2.581    | 1.027     | 1.614      | 0.058               | 0.759                   | -0.18       | -0.13       | 1.06        | 0.402         | 16.51    | -12.35   |
|                            | 2.581    | 1.032     | 1.605      | 0.059               | 0.779                   | -0.17       | -0.12       | 1.07        | 0.409         | 16.95    | -12.69   |
| C14—H14···O1 <sup>ii</sup> | 2.320    | 0.923     | 1.399      | 0.057               | 1.162                   | -0.20       | -0.20       | 1.56        | 0.007         | 23.74    | -15.84   |
|                            | 2.320    | 0.928     | 1.397      | 0.059               | 1.163                   | -0.22       | -0.22       | 1.61        | 0.012         | 23.95    | -16.22   |
| C8—H8···O2 <sup>iii</sup>  | 2.662    | 1.210     | 1.488      | 0.051               | 0.752                   | -0.17       | -0.16       | 1.08        | 0.080         | 15.86    | -11.24   |
|                            | 2.662    | 1.223     | 1.483      | 0.045               | 0.694                   | -0.15       | -0.13       | 0.97        | 0.141         | 14.39    | -9.89    |
| C8—H8···O3                 | 2.704    | 1.233     | 1.500      | 0.043               | 0.628                   | -0.15       | -0.12       | 0.90        | 0.209         | 13.05    | -9.00    |
|                            | 2.704    | 1.233     | 1.507      | 0.040               | 0.613                   | -0.13       | -0.12       | 0.86        | 0.149         | 12.60    | -8.51    |
| C13···C8                   | 3.326    | 1.637     | 1.721      | 0.041               | 0.467                   | -0.08       | -0.01       | 0.56        | 6.900         | 9.99     | -7.26    |
|                            | 3.326    | 1.648     | 1.704      | 0.042               | 0.484                   | -0.08       | -0.02       | 0.58        | 3.110         | 10.37    | -7.57    |
| C4—H4···C6 <sup>iv</sup>   | 2.693    | 1.097     | 1.636      | 0.039               | 0.539                   | -0.11       | -0.07       | 0.72        | 0.516         | 11.19    | -7.70    |
|                            | 2.693    | 1.099     | 1.625      | 0.040               | 0.562                   | -0.10       | -0.07       | 0.73        | 0.324         | 11.65    | -7.99    |
| C10—H10C···O2 <sup>v</sup> | 2.867    | 1.297     | 1.628      | 0.037               | 0.519                   | -0.11       | -0.04       | 0.67        | 1.770         | 10.73    | -7.32    |
|                            | 2.867    | 1.255     | 1.633      | 0.035               | 0.513                   | -0.10       | -0.04       | 0.66        | 1.377         | 10.51    | -7.05    |
| C10—H10B···O3 <sup>v</sup> | 2.926    | 1.293     | 1.687      | 0.035               | 0.489                   | -0.08       | -0.06       | 0.63        | 0.261         | 10.07    | -6.83    |
|                            | 2.926    | 1.296     | 1.686      | 0.032               | 0.466                   | -0.07       | -0.05       | 0.58        | 0.305         | 9.49     | -6.28    |
| C10—H10C···O1 <sup>v</sup> | 2.542    | 1.004     | 1.543      | 0.035               | 0.731                   | -0.12       | -0.09       | 0.94        | 0.268         | 14.44    | -8.98    |
|                            | 2.542    | 1.019     | 1.532      | 0.033               | 0.721                   | -0.10       | -0.08       | 0.90        | 0.284         | 14.15    | -8.67    |
| C13—H13···O2 <sup>ii</sup> | 2.615    | 1.090     | 1.539      | 0.034               | 0.613                   | -0.12       | -0.11       | 0.84        | 0.102         | 12.25    | -7.81    |
|                            | 2.615    | 1.111     | 1.528      | 0.034               | 0.603                   | -0.11       | -0.11       | 0.82        | 0.001         | 12.06    | -7.69    |
| C2—H2A···C12 <sup>i</sup>  | 2.856    | 1.195     | 1.709      | 0.033               | 0.429                   | -0.08       | -0.05       | 0.57        | 0.523         | 8.83     | -5.97    |
|                            | 2.856    | 1.197     | 1.701      | 0.032               | 0.442                   | -0.07       | -0.05       | 0.56        | 0.429         | 9.04     | -6.04    |
| C2—H2A···O3 <sup>i</sup>   | 2.633    | 1.042     | 1.592      | 0.031               | 0.635                   | -0.10       | -0.08       | 0.81        | 0.183         | 12.51    | -7.73    |
|                            | 2.633    | 1.056     | 1.578      | 0.030               | 0.623                   | -0.09       | -0.06       | 0.78        | 0.473         | 12.24    | -7.50    |
| C3—H3···C16 <sup>i</sup>   | 2.963    | 1.189     | 1.824      | 0.030               | 0.401                   | -0.07       | -0.04       | 0.50        | 0.963         | 8.18     | -5.43    |
|                            | 2.963    | 1.174     | 1.799      | 0.030               | 0.422                   | -0.06       | -0.02       | 0.50        | 1.942         | 8.56     | -5.62    |
| C11—H11C···C5              | 3.076    | 1.290     | 1.800      | 0.029               | 0.312                   | -0.08       | -0.05       | 0.44        | 0.632         | 6.51     | -4.53    |
|                            | 3.076    | 1.238     | 1.847      | 0.023               | 0.337                   | -0.06       | -0.04       | 0.43        | 0.398         | 6.69     | -4.21    |
| C11···H14 <sup>v</sup>     | 3.218    | 1.405     | 1.853      | 0.028               | 0.347                   | -0.08       | -0.06       | 0.49        | -0.06         | 0.49     | -0.06    |
|                            | 3.218    | 1.405     | 1.866      | 0.030               | 0.370                   | -0.08       | -0.06       | 0.50        | -0.06         | 0.50     | -0.06    |
| C10—H10A···O3              | 2.761    | 1.177     | 1.604      | 0.024               | 0.448                   | -0.07       | -0.07       | 0.59        | 0.025         | 8.78     | -5.36    |
|                            | 2.761    | 1.210     | 1.583      | 0.025               | 0.432                   | -0.07       | -0.06       | 0.56        | 0.251         | 8.51     | -5.25    |
| C11···H3 <sup>i</sup>      | 3.280    | 1.417     | 1.905      | 0.022               | 0.283                   | -0.06       | -0.05       | 0.39        | 0.110         | 5.66     | -3.63    |
|                            | 3.280    | 1.409     | 1.921      | 0.024               | 0.309                   | -0.06       | -0.04       | 0.41        | 0.279         | 6.26     | -4.10    |
| C11···H16 <sup>vi</sup>    | 2.987    | 1.120     | 1.878      | 0.021               | 0.395                   | -0.05       | -0.05       | 0.50        | 0.032         | 7.67     | -4.56    |

|                                |       |       |       |       |       |       |       |      |       |      |       |
|--------------------------------|-------|-------|-------|-------|-------|-------|-------|------|-------|------|-------|
|                                | 2.987 | 1.115 | 1.881 | 0.024 | 0.426 | -0.06 | -0.06 | 0.55 | 0.006 | 8.38 | -5.15 |
| C15—H15 $\cdots$ C3            | 3.140 | 1.298 | 1.892 | 0.018 | 0.275 | -0.05 | -0.03 | 0.36 | 0.730 | 5.39 | -3.29 |
|                                | 3.140 | 1.321 | 1.879 | 0.020 | 0.278 | -0.05 | -0.02 | 0.35 | 1.045 | 5.51 | -3.44 |
| C6—H6 $\cdots$ C16             | 3.229 | 1.348 | 1.900 | 0.017 | 0.233 | -0.04 | -0.02 | 0.29 | 0.633 | 4.59 | -2.83 |
|                                | 3.229 | 1.353 | 1.902 | 0.016 | 0.223 | -0.03 | -0.02 | 0.27 | 0.984 | 4.35 | -2.63 |
| Cl1 $\cdots$ Cl1 <sup>vi</sup> | 4.186 | 2.093 | 2.093 | 0.011 | 0.149 | -0.02 | -0.01 | 0.18 | 1.959 | 2.87 | -1.68 |
|                                | 4.190 | 2.095 | 2.095 | 0.015 | 0.190 | -0.03 | -0.01 | 0.23 | 1.267 | 3.73 | -2.28 |

Symmetry codes: (i)  $-x+1, y-1/2, -z+1/2$ ; (ii)  $-x+1, -y, -z+1$ ; (iii)  $-x+1, -y+1, -z+1$ ; (iv)  $-x, y+1/2, -z+1/2$ ; (v)  $x, y-1, z$ ; (vi)  $-x+2, -y+1, -z+1$ .

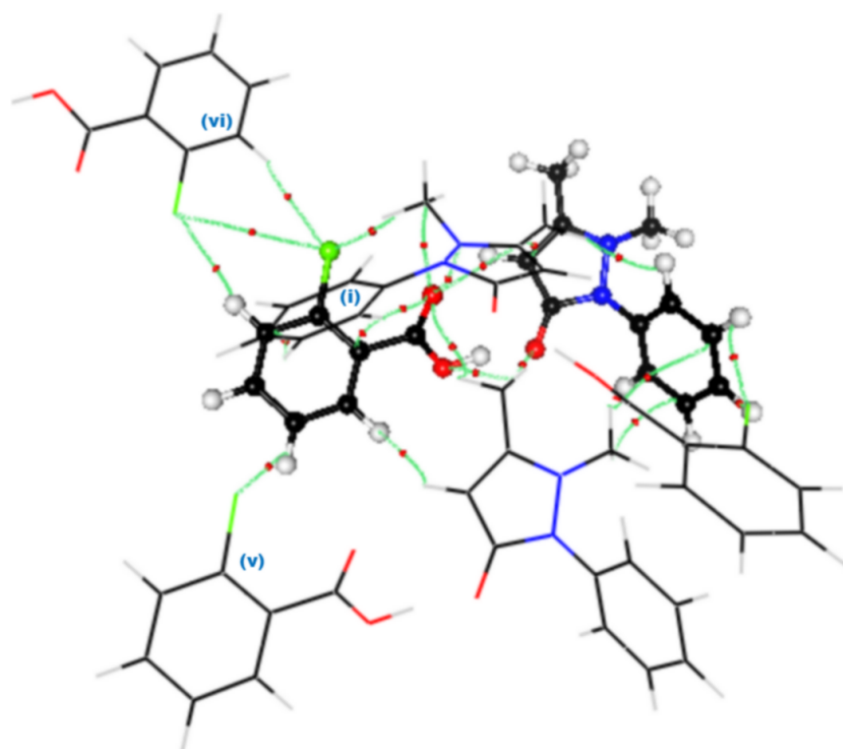

**Figure S16:** A view of the reference dimer in Bold (AN-CBA) surrounded by a cluster of neighbouring molecules, showing the intermolecular bond paths (green lines) and critical points (red dots) with Cl1 atom. symmetry codes are as in the main text.



**Table S6**

Valance population of AN and CBA moiety along with electrostatic potential of experimental and theoretical AN-CBA.

| ATOMS        | AN_EXP          | AN_THEO         | ATOMS | CBA_EXP         | CAB_THEO        |
|--------------|-----------------|-----------------|-------|-----------------|-----------------|
| N1           | 5.19213         | 5.04441         | C11   | 7.10304         | 7.1988          |
| O1           | 6.39196         | 6.22623         | O2    | 6.39553         | 6.21893         |
| C1           | 4.06782         | 4.02175         | H2    | 0.60546         | 0.70887         |
| N2           | 5.20049         | 5.02377         | O3    | 6.13726         | 6.04038         |
| C2           | 4.01798         | 4.05285         | C12   | 3.92065         | 3.9644          |
| H2A          | 0.88305         | 0.91551         | C13   | 4.24215         | 4.07078         |
| C3           | 4.26912         | 4.053           | H13   | 0.81387         | 0.90052         |
| H3           | 0.81395         | 0.93076         | C14   | 4.07131         | 4.06194         |
| C4           | 4.07122         | 4.08872         | H14   | 0.81401         | 0.8881          |
| H4           | 0.81385         | 0.91503         | C15   | 4.02533         | 4.08453         |
| C5           | 4.26905         | 4.06063         | H15   | 0.81387         | 0.92675         |
| H5           | 0.81392         | 0.9368          | C16   | 4.09493         | 4.02892         |
| C6           | 4.01818         | 4.05622         | H16   | 0.8715          | 0.91707         |
| H6           | 0.883           | 0.92493         | C17   | 4.10221         | 4.00001         |
| C7           | 4.13507         | 4.12201         | C18   | 4.07021         | 4.11504         |
| C8           | 4.21706         | 3.81711         |       |                 |                 |
| H8           | 0.79375         | 0.89695         |       |                 |                 |
| C9           | 3.61309         | 4.18632         |       |                 |                 |
| C10          | 4.3365          | 3.95701         |       |                 |                 |
| H10A         | 0.88165         | 0.93274         |       |                 |                 |
| H10B         | 0.88156         | 0.94347         |       |                 |                 |
| H10C         | 0.88164         | 0.93885         |       |                 |                 |
| C11          | 4.70046         | 4.04128         |       |                 |                 |
| H11A         | 0.59078         | 0.92378         |       |                 |                 |
| H11B         | 0.59081         | 0.95399         |       |                 |                 |
| H11C         | 0.59088         | 0.91081         |       |                 |                 |
| <b>Total</b> | <b>71.91897</b> | <b>71.87493</b> |       | <b>52.08133</b> | <b>52.12504</b> |

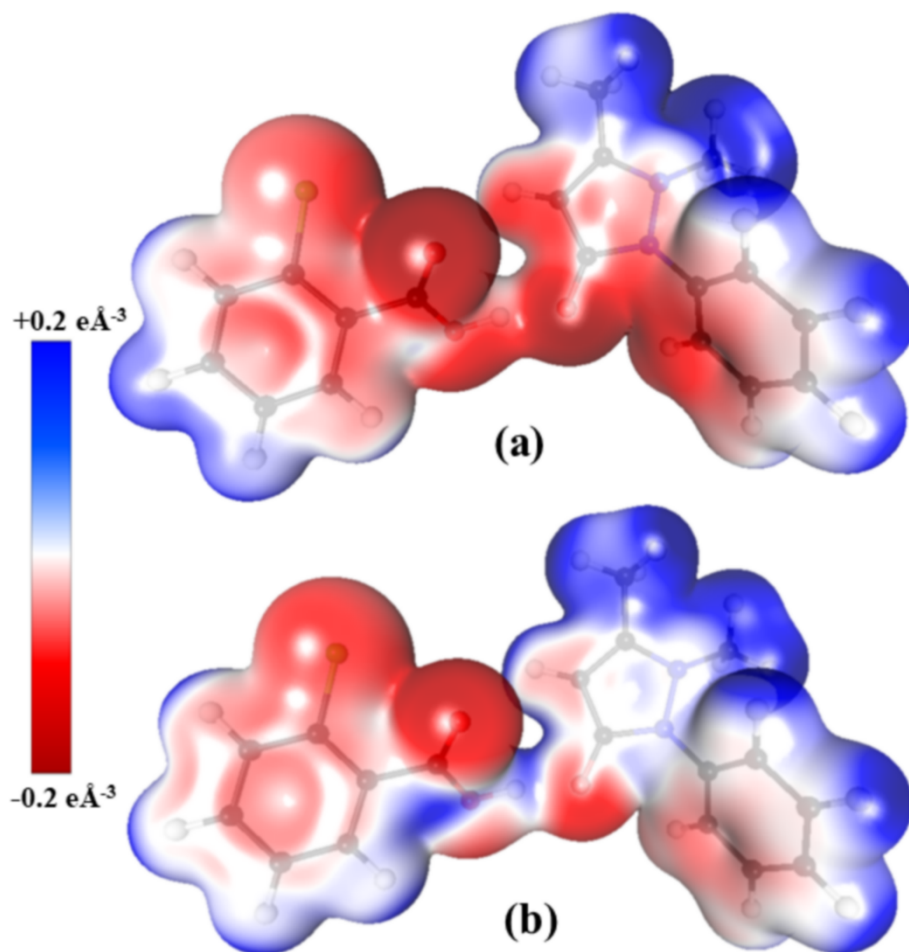

**Figure S17:** Electrostatic potential of co-crystal (AN-CBA) after multipolar refinement generated at isosurface value of 0.05 e/Å<sup>3</sup>, (a) experimental and (b) theoretical.

## References

1. P. S. V. Kumar, V. Raghavendra and V. Subramanian, *Journal of Chemical Sciences*, 2016, **128**, 1527-1536.
2. B. Guillot, 2012.
3. V. R. Hathwar, R. G. Gonnade, P. Munshi, M. M. Bhadbhade and T. N. Guru Row, *Crystal Growth & Design*, 2011, **11**, 1855-1862.
4. V. R. Hathwar and T. N. Guru Row, *Crystal Growth & Design*, 2011, **11**, 1338-1346.
5. A. Owczarzak and M. Kubicki, *Crystals*, 2018, **8**, 132.
6. M. Gryl, S. Cenedese and K. Stadnicka, *The Journal of Physical Chemistry C*, 2015, **119**, 590-598.
7. B. Fournier, E.-E. Bendeif, B. Guillot, A. Podjarny, C. Lecomte and C. Jelsch, *Journal of the American Chemical Society*, 2009, **131**, 10929-10941.
8. C. Kalaiarasi, M. S. Pavan and P. Kumaradhas, *Acta Crystallographica Section B: Structural Science, Crystal Engineering and Materials*, 2016, **72**, 775-786.
9. M. Gryl, A. Krawczuk-Pantula and K. Stadnicka, *Acta Crystallographica Section B: Structural Science*, 2011, **67**, 144-154.
10. J. Hey, D. Leusser, D. Kratzert, H. Fliegl, J. M. Dieterich, R. A. Mata and D. Stalke, *Physical Chemistry Chemical Physics*, 2013, **15**, 20600-20610.
11. C. Gatti, V. Saunders and C. Roetti, *The Journal of chemical physics*, 1994, **101**, 10686-10696.
12. C. Silva Lopez and A. R de Lera, *Current Organic Chemistry*, 2011, **15**, 3576-3593.
13. R. F. Bader, *Chemical Reviews*, 1991, **91**, 893-928.
